# Supplementary material for: Deep Eutectic Solvent-Based Microwave-Assisted Method for Extraction of Hydrophilic and Hydrophobic Components from Radix Salviae miltiorrhizae
Source: PubMed Central journal article supplement (PMC6274102; doi:10.3390/molecules21101383), 2016-10-17
Supplement: molecules-21-01383-s001.pdf [file molecules-21-01383-s001.pdf]

# Supplementary Materials: Deep Eutectic Solvent-Based Microwave-Assisted Method for Extraction of Hydrophilic and Hydrophobic Components from *Radix Salviae miltiorrhizae*

Jue Chen, Mengjun Liu, Qi Wang, Huizhi Du and Liwei Zhang

**Table S1.** The results of complete or reduced special-quartic mixture models fit to six responses.

| Model Term in Pseudo-Components | Model Coefficients( $\beta_i$ ) Estimated from Data <sup>a</sup> |       |       |       |       |
|---------------------------------|------------------------------------------------------------------|-------|-------|-------|-------|
|                                 | ROS                                                              | LIT   | SAB   | SAA   | TIIA  |
| $\beta_0$                       | 2.76                                                             | 3.06  | 53.88 | 2.08  | 5.55  |
| <i>A-Temp</i>                   | 0.10                                                             | 0.22  | 2.11  | 0.15  | 0.52  |
| <i>B-Time</i>                   | 0.17                                                             | 0.08  | -0.07 | 0.05  | 0.26  |
| <i>C-Power</i>                  | -0.09                                                            | 0.06  | -0.59 | -0.12 | 0.36  |
| <i>D-S/L ratio</i>              | -0.05                                                            | -0.27 | 2.09  | -0.20 | 0.06  |
| <i>AB</i>                       | -0.30                                                            | 0     | -1.41 | 0.10  | 0.29  |
| <i>AC</i>                       | 0.57                                                             | 0     | -1.87 | -0.12 | 0.36  |
| <i>AD</i>                       | 0.12                                                             | -0.48 | -1.20 | 0.08  | 0     |
| <i>BC</i>                       | -0.51                                                            | 0.20  | 0     | 0.09  | -0.35 |
| <i>BD</i>                       | -0.23                                                            | 0.10  | 0     | -0.08 | 0.16  |
| <i>CD</i>                       | -0.25                                                            | 0.14  | 0     | -0.11 | -0.31 |
| <i>A</i> <sup>2</sup>           | -0.19                                                            | -0.24 | -2.56 | -0.15 | -0.40 |
| <i>B</i> <sup>2</sup>           | -0.30                                                            | -0.10 | -1.14 | -0.23 | -0.10 |
| <i>C</i> <sup>2</sup>           | -0.68                                                            | -0.07 | -6.03 | -0.31 | -0.49 |
| <i>D</i> <sup>2</sup>           | 0                                                                | -0.33 | -4.50 | -0.20 | -0.11 |
| Summary statistics              |                                                                  |       |       |       |       |
| R-Squared                       | 0.965                                                            | 0.958 | 0.957 | 0.969 | 0.950 |
| Adj R-Squared                   | 0.934                                                            | 0.927 | 0.929 | 0.938 | 0.907 |

<sup>a</sup> Coefficient was statistically significant with at least 95% confidence.

**Table S2.** The ANOVA for the experimental results of the BBD.

| Source                | ROS    |                      | LIT   |                      | SAB    |                      | SAA    |                      | TIIA  |                      |
|-----------------------|--------|----------------------|-------|----------------------|--------|----------------------|--------|----------------------|-------|----------------------|
|                       | F      | P                    | F     | P                    | F      | P                    | F      | P                    | F     | P                    |
| Model                 | 31.65  | <0.0001 <sup>S</sup> | 30.48 | <0.0001 <sup>S</sup> | 34.23  | <0.0001 <sup>S</sup> | 31.38  | <0.0001 <sup>S</sup> | 22.04 | <0.0001 <sup>S</sup> |
| <i>A-Temp</i>         | 7.05   | 0.0180 <sup>S</sup>  | 58.97 | <0.0001 <sup>S</sup> | 43.97  | <0.0001 <sup>S</sup> | 57.74  | <0.0001 <sup>S</sup> | 94.92 | <0.0001 <sup>S</sup> |
| <i>B-Time</i>         | 19.90  | 0.0005 <sup>S</sup>  | 7.93  | 0.0124 <sup>S</sup>  | 0.05   | 0.8205 <sup>NS</sup> | 6.63   | 0.0221 <sup>S</sup>  | 24.82 | 0.0002 <sup>S</sup>  |
| <i>C-Power</i>        | 5.52   | 0.0329 <sup>S</sup>  | 3.85  | 0.0673 <sup>NS</sup> | 3.40   | 0.0828 <sup>NS</sup> | 34.76  | <0.0001 <sup>S</sup> | 45.31 | <0.0001 <sup>S</sup> |
| <i>D-S/L ratio</i>    | 1.43   | 0.2499 <sup>NS</sup> | 85.97 | <0.0001 <sup>S</sup> | 42.94  | <0.0001 <sup>S</sup> | 101.80 | <0.0001 <sup>S</sup> | 1.25  | 0.2806 <sup>NS</sup> |
| <i>AB</i>             | 20.12  | 0.0004 <sup>S</sup>  | -     | -                    | 6.54   | 0.0204 <sup>S</sup>  | 7.47   | 0.0162 <sup>S</sup>  | 10.21 | 0.0060 <sup>S</sup>  |
| <i>AC</i>             | 73.85  | <0.0001 <sup>S</sup> | -     | -                    | 11.47  | 0.0035 <sup>S</sup>  | 11.92  | 0.0039 <sup>S</sup>  | 15.03 | 0.0015 <sup>S</sup>  |
| <i>AD</i>             | 3.41   | 0.0846 <sup>NS</sup> | 90.40 | <0.0001 <sup>S</sup> | 4.70   | 0.0447 <sup>S</sup>  | 5.63   | 0.0325 <sup>S</sup>  | -     | -                    |
| <i>BC</i>             | 60.29  | <0.0001 <sup>S</sup> | 15.92 | 0.0011 <sup>S</sup>  | -      | -                    | 7.08   | 0.0186 <sup>S</sup>  | 14.41 | 0.0018 <sup>S</sup>  |
| <i>BD</i>             | 12.55  | 0.0030 <sup>S</sup>  | 4.28  | 0.0551 <sup>NS</sup> | -      | -                    | 4.97   | 0.0427 <sup>S</sup>  | 3.05  | 0.1010 <sup>NS</sup> |
| <i>CD</i>             | 14.78  | 0.0016 <sup>S</sup>  | 7.88  | 0.0126 <sup>S</sup>  | -      | -                    | 10.47  | 0.0060 <sup>S</sup>  | 11.10 | 0.0046 <sup>S</sup>  |
| <i>A</i> <sup>2</sup> | 13.18  | 0.0025 <sup>S</sup>  | 36.37 | <0.0001 <sup>S</sup> | 34.97  | <0.0001 <sup>S</sup> | 31.79  | <0.0001 <sup>S</sup> | 31.07 | <0.0001 <sup>S</sup> |
| <i>B</i> <sup>2</sup> | 34.28  | <0.0001 <sup>S</sup> | 5.87  | 0.0276 <sup>S</sup>  | 6.89   | 0.0177 <sup>S</sup>  | 72.64  | <0.0001 <sup>S</sup> | 1.77  | 0.2028 <sup>NS</sup> |
| <i>C</i> <sup>2</sup> | 177.14 | <0.0001 <sup>S</sup> | 3.23  | 0.0914 <sup>NS</sup> | 193.92 | <0.0001 <sup>S</sup> | 127.03 | <0.0001 <sup>S</sup> | 46.83 | <0.0001 <sup>S</sup> |
| <i>D</i> <sup>2</sup> |        |                      | 69.75 | <0.0001 <sup>S</sup> | 108.17 | <0.0001 <sup>S</sup> | 51.77  | <0.0001 <sup>S</sup> | 2.21  | 0.1574 <sup>NS</sup> |
| <i>Lack of Fit</i>    | 36.55  | 0.0017 <sup>S</sup>  | 2.08  | 0.2497 <sup>NS</sup> | 1.32   | 0.4299 <sup>NS</sup> | 4.37   | 0.0842 <sup>S</sup>  | 2.08  | 0.2507 <sup>NS</sup> |

F: Test statistic, P: *p*-value, LOF: Lack of Fit. <sup>S</sup> means significant, <sup>NS</sup> means not significant.

**Table S3.** The constraints and results of numerical optimization with the desirability function.

| Parameter    | Goal     | Experimental Region |       | Weight |       | Importance | Solutions |
|--------------|----------|---------------------|-------|--------|-------|------------|-----------|
|              |          | Lower               | Upper | Lower  | Upper |            |           |
| Temperature  | In range | 40                  | 80    | 1      | 1     | 3          | 71.01     |
| Time         | In range | 5                   | 15    | 1      | 1     | 3          | 11.11     |
| Power        | In range | 600                 | 1000  | 1      | 1     | 3          | 827.88    |
| S/L ratio    | In range | 0.005               | 0.01  | 1      | 1     | 3          | 0.007     |
| ROS          | Maximize | 1.21                | 2.83  | 1      | 1     | 5          | 2.80      |
| LIT          | Maximize | 1.99                | 3.35  | 1      | 1     | 5          | 3.24      |
| SAB          | Maximize | 39.41               | 55.64 | 1      | 1     | 5          | 53.14     |
| SAA          | Maximize | 1.05                | 2.12  | 1      | 1     | 5          | 2.13      |
| TIIA         | Maximize | 3.97                | 5.95  | 1      | 1     | 5          | 5.85      |
| Desirability |          |                     |       |        |       |            | 0.94      |
